# Supplementary material for: Effect of pretreatment on the formation of 5-chloromethyl furfural derived from sugarcane bagasse
Source: Royal Society of Chemistry journal article supplement (doi:10.1039/c5ra20203e), 2015-12-28
Supplement: c5ra20203e1.pdf [file c5ra20203e1.pdf]

## Supplementary Figures

Figure S1 FTIR of (a) bagasse and (b) solid residue

Figure S2  $^{13}\text{C}$  CP-MAS NMR spectrum of bagasse hydrolysis residue

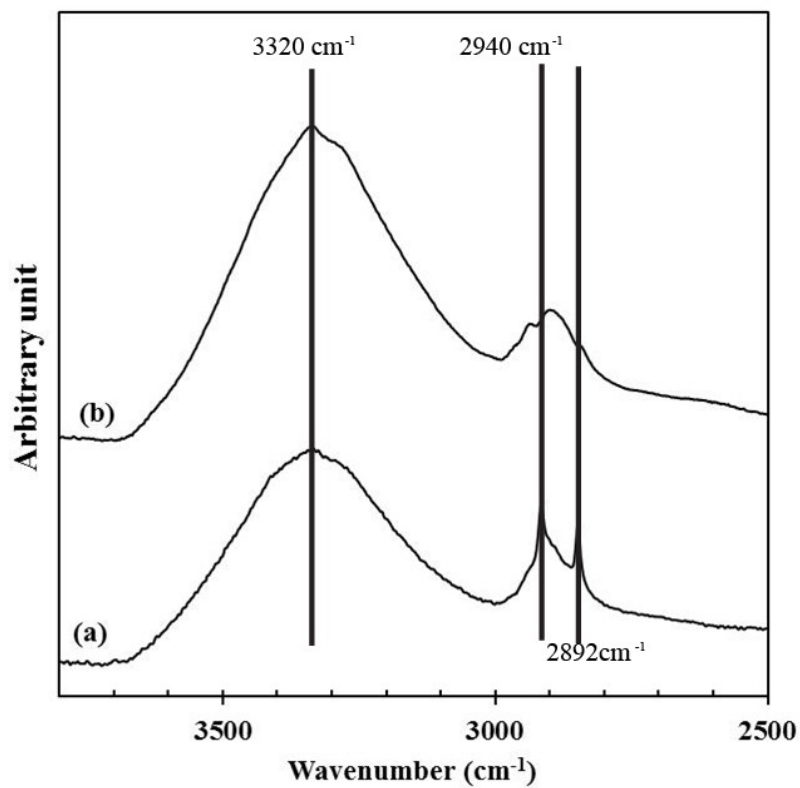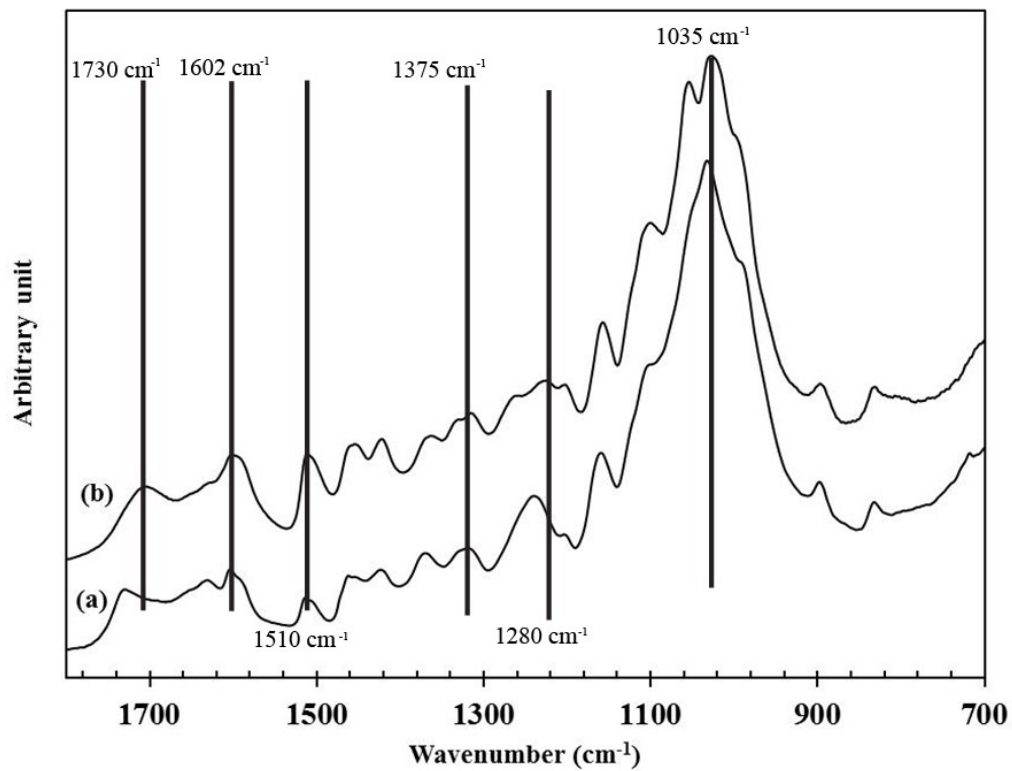

Figure S1

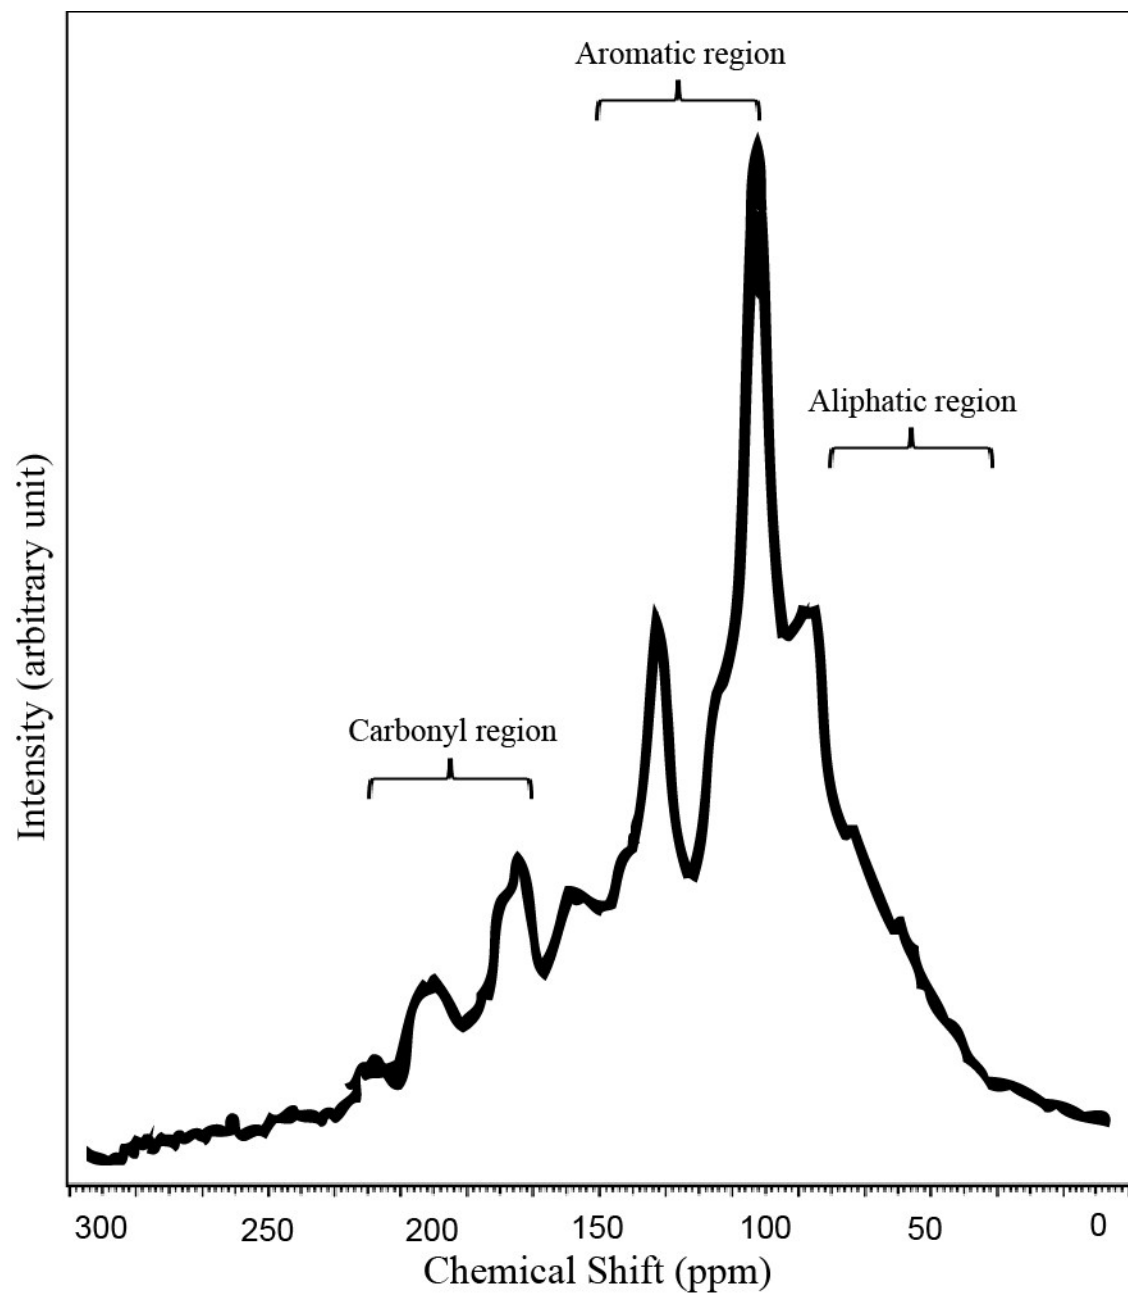

Figure S2
